# Supplementary material
Source: publisher figshare collection journal article supplement (https://future-science-group.figshare.com/ndownloader/files/18027563)
Supplement: Supplementary file 1 [file 18027563]

## Sheet: Raw (Cq) Data
Raw Data
empty cells indicate levels below the limit of detection
Sample ID	CC_R1	TT_R1	ST_R1	TEC_R1	CC_R2	TT_R2	ST_R2	TEC_R2
Replicate	1	1	1	1	2	2	2	2
Compartment	Whole Tumor	TT	ST	TEC	Whole Tumor	TT	ST	TEC
hsa-let-7a-5p	15.6	23.34	23.7	25.99	17.5	26.12	26.06	27.65
hsa-let-7b-5p	18.35	25.61	25.06	27.65	19.52	27.53	27.64	28.92
hsa-let-7c	18.91	27.17	26.56	30.08	20.99	30.08	30.04	31.36
hsa-let-7d-3p	21.95	28.69	29.01	31.66	23.8	30.8	31.79	33.6
hsa-let-7d-5p	19.78	27.82	28.64	30.56	22.03	30.01	30.98	31.98
hsa-let-7e-5p	20.62	30.92	27.58	30.18	22.31	32.6	30.21	30.59
hsa-let-7f-5p	18.69	27.12	28.5	30.8	20.91	30.32	30.6	31.97
hsa-let-7g-5p	17.12	25.16	25.99	27.84	19.7	28.44	28.46	29.76
hsa-let-7i-5p	19.45	28.53	26.91	29.69	21.09	31.15	28.46	30.3
hsa-miR-1	24.79	36.79	31.89	34.52	30.24		40
hsa-miR-100-5p	18.96	32.76	25.81	30.15	20.94	33.37	28.49	31.54
hsa-miR-101-3p	19.94	27.54	27.6	29.97	21.35	30.7	30.36	32.38
hsa-miR-103a-3p	16.82	24.03	25.67	27.08	19.51	26.97	28.09	28.95
hsa-miR-105-5p	32.76				36.04
hsa-miR-106a-5p	16.86	23.94	27.85	27.03	18.91	25.13	28.79	29.13
hsa-miR-106b-5p	19.49	26.17	28.86	29.45	21.47	27.91	30.34	31.24
hsa-miR-107	18.3	25.56	27.56	28.71	21.05	28.33	29.78	30.74
hsa-miR-10a-5p	19.68	28.59	29.49	31.51	22.13	29.28	32.53	33.74
hsa-miR-10b-5p	20.02	30.72	27.97	29.29	22.08	30.07	29.98	31.05
hsa-miR-122-5p	28.49	36.21	35.5		30.61
hsa-miR-124-3p	28.99	36.15	34.79	37.19	32.68	40		36.97
hsa-miR-125a-5p	18.52	29.75	25.49	28.39	20.49	30.68	27.9	29.2
hsa-miR-125b-5p	16.53	29.11	23.01	27.26	18.7	31.6	26.45	28.93
hsa-miR-126-3p	17	29.65	24.69	25.75	20.71	32.17	28.44	26.96
hsa-miR-126-5p	18.93	32.3	27.1	28.32	23	34.62	31.23	30.15
hsa-miR-127-3p	22.45	34.62	29.17	33.28	24.66	34.88	31.76	33.37
hsa-miR-127-5p	29.98	40	36.67	40	32.78	40		38.23
hsa-miR-128	24.04	30.88	32.26	33.03	24.89	30.55	32.52	32.89
hsa-miR-129-2-3p	28.58		36.18	40	33.32
hsa-miR-129-5p	30.93	40			36.17
hsa-miR-130a-3p	22.56	34.72	30.46	33.3	25.45	36.8	33.12	34.49
hsa-miR-130b-3p	24.08	32.09	35.47	35.56	26.6	34.14	36.85	37.62
hsa-miR-132-3p	22.08	30.66	30.31	32.56	24.92	33.91	33	33.06
hsa-miR-133a	24.13	35.34	30.04	33.71	29.28		35.98	35.33
hsa-miR-133b	24.58	35.93	30.97	33.27	29.46		38.2	36.02
hsa-miR-134	27.3	35.15	34.2	35.19	29.62	37.09	35.79	36.11
hsa-miR-135a-5p	23.43	30.27	36.26	33.75	24.68	33.49	36.67	37.27
hsa-miR-135b-5p	19.53	26.68	33.05	30.01	21.06	29.55	33.13	34.14
hsa-miR-136-5p	26.44	34.49	29.52	32.44	27.82	36	31.91	33.61
hsa-miR-137	31.56		39.03	39.4	32.68
hsa-miR-138-5p	27.66	40	35.71	38.25	28.99	40	36.01
hsa-miR-139-5p	25.48	34.28	33.51	36.02	28.75		35.19	35.99
hsa-miR-140-3p	20.63	30.03	28.25	30.67	23.15	33.02	31.3	32.84
hsa-miR-140-5p	22	31.09	29.77	31.84	24.43	33.93	32.05	32.8
hsa-miR-141-3p	16.35	23.04	28.06	26.63	17.1	25.57	29.16	29.14
hsa-miR-142-3p	17.5	28.4	24.85	28.66	19.39	30.36	28.16	29.9
hsa-miR-142-5p	25.35	34.51	30.19	33.71	26.21	35.18	33.33	35.15
hsa-miR-143-3p	17.27	29.67	24.93	26.99	20.07	32.23	27.79	29.17
hsa-miR-144-3p	29.8	35.45	35.51	35.5	27.34		40	37.35
hsa-miR-145-5p	16.31	28.13	22.58	25.75	18.88	31.09	26.09	27.8
hsa-miR-146a-5p	19.85	29.68	29	31.57	22.62	32.14	31.37	33.13
hsa-miR-146b-5p	21.08	32.97	29.22	32.51	22.89	34.1	32.06	33.54
hsa-miR-147a	31.09	35.67			33.79
hsa-miR-147b	28.51	34.66			30.47	36.85
hsa-miR-148a-3p	17.01	24.43	27.38	27.87	21.21	30	29.52	31.05
hsa-miR-148b-3p	21.72	28.76	29.99	31.69	23.67	31.71	32.1	32.99
hsa-miR-149-5p	24.71	33.88	32.64	34.2	27.46	33.87	34.2	40
hsa-miR-150-5p	18.57	30.04	26.89	29.95	22.56	34.68	30.82	32.95
hsa-miR-151a-3p	20.99	28.97	31.03	31.7	23.89	33.07	33.12	34.54
hsa-miR-151a-5p	19.33	26.97	28.71	29.98	21.78	30.89	30.94	31.77
hsa-miR-152	20.61	30.87	27.72	30.83	22.56	33.07	29.76	31.97
hsa-miR-153	24.38	30.2	35.68	33.62	27.57	33.79	35.68	37.04
hsa-miR-154-3p	31.28		37.96	40	32.46
hsa-miR-154-5p	23.83	36.4	30.75	34.57	25.99		33.03
hsa-miR-155-5p	21.15	32.82	29.83	32.77	23.1	31.33	32.03	33.62
hsa-miR-15a-5p	18.54	25.7	27.36	28.47	20.73	27.52	28.95	29.87
hsa-miR-15b-5p	19.59	27.18	28.82	30.59	22.26	29.85	31.57	32.23
hsa-miR-16-1-3p	24.82	32.52	32.84	32.42	27.03	32.5	33.92	32.99
hsa-miR-16-5p	15.08	22.89	24.09	25.49	17.45	24.94	26.16	27.24
hsa-miR-17-5p	22.17	28.98	33.87	32.08	24.22	30.48	35.34	34.54
hsa-miR-181a-3p	25.57	37.21	34.46		26.9	35.63	35.95	40
hsa-miR-181a-5p	18.61	27.61	26.67	29.07	20.03	27.48	28.67	29.76
hsa-miR-181b-5p	22.04	31.89	31.26	33.8	23.18	31.65	33.52	34.35
hsa-miR-181c-5p	24.63	32.97	33.01	35.91	27.15	34.04	35.96	36.58
hsa-miR-181d	24.72	32.79	32.99	34.72	26.94	33.26	35.73	38.44
hsa-miR-182-5p	20.96	28.86	35.68	32.55	23.38	31.26	36.41	37.28
hsa-miR-183-5p	22.07	30.14	36.89	33.31	24.34	32.37	37.02	37.89
hsa-miR-184	35	40			33.51
hsa-miR-185-3p	29.49		40		31.79
hsa-miR-185-5p	21.99	30.4	31.05	32.78	24.25	33.8	32.65	34.97
hsa-miR-186-5p	20.12	28.66	28.92	30.78	22.55	31.15	31.7	32.79
hsa-miR-187-3p	30.79		38.81	35.9	32.06
hsa-miR-187-5p	38.37	40	40	40	40	40	39.49	40
hsa-miR-188-5p	26.89	33.59	35.96	37	30.76	37.18	38.22	37.92
hsa-miR-18a-3p	24.12	31.68	34.94	34.89	26.38	33.24	36.46	38.15
hsa-miR-18a-5p	20.37	27.8	31.28	30.58	23.01	29.67	33.59	32.69
hsa-miR-18b-5p	20.16	27.62	31.48	30.21	22.69	29.46	32.64	32.16
hsa-miR-190a	25.56	32.96	34.44	35.77	28.06	40	40	38.36
hsa-miR-191-5p	18.92	26.45	28.87	29.67	21.75	29.8	31.25	32.97
hsa-miR-192-5p	15.19	22.8	27.96	26.15	18.91	26.59	30.61	30.16
hsa-miR-193a-3p	26.82	35.42	35.24	37.92	28.21	36.98	37.98	40
hsa-miR-193a-5p	25.63	34.15	33.15	34.95	25.88	35.02	34.76	35.52
hsa-miR-193b-3p	20.67	29.84	28.48	31.66	22.16	30.59	29.47	32.37
hsa-miR-194-5p	15.31	23.26	28.53	26.74	19.08	26.8	31.25	31.01
hsa-miR-195-5p	20.25	30.68	27.12	29.49	21.76	34.37	29.18	30.7
hsa-miR-196a-5p	20.74	29.38	33.78	33.02	24.24	31.03	36.22	35.18
hsa-miR-196b-5p	18.25	26.73	28.57	29.88	21.81	29.06	32.33	33.16
hsa-miR-197-3p	21.25	29.08	29.21	31.49	22.99	31.14	31.74	32.58
hsa-miR-198	33.81				34.14		38.27
hsa-miR-199a-3p	18.27	31.14	25.88	29.32	20.36	33.88	27.95	30.25
hsa-miR-199a-5p	20.47	32.09	26.96	30.78	22.05	34.27	28.52	30.75
hsa-miR-199b-5p	20.79	31.29	27.05	31.08	22.6	34.59	28.85	32.35
hsa-miR-19a-3p	19.63	23.61	26.74	26.58	18.83	25.06	28.64	29.09
hsa-miR-19b-3p	17.87	22.5	25.58	25.31	17.59	23.95	27.33	27.92
hsa-miR-200a-3p	18.32	24.83	31.04	28.32	20.45	27.81	31.91	31.89
hsa-miR-200b-3p	15.41	23.19	29.87	26.85	18.49	26.83	31.54	31.24
hsa-miR-200c-3p	15.01	22.78	27.88	26.18	16.9	25.34	29.01	28.81
hsa-miR-202-3p	34.58				37.66
hsa-miR-202-5p	33.17			40	35.71
hsa-miR-203a	19.12	26.19	32.87	29.22	22.83	31.38	33.75	32.83
hsa-miR-204-5p	24	33.79	35.6	37	29.57	35.3		37.48
hsa-miR-205-5p	32.96		34.04		22.74	34.08	34.01	32.14
hsa-miR-206	31.08	37.6	36.44	38.41	39.04	36.67	37.14	37.27
hsa-miR-20a-5p	16.24	23.33	27.32	26.49	18.24	24.53	28.34	28.84
hsa-miR-20b-3p	35.63	40			30.14	40	40
hsa-miR-20b-5p	31.75	40		37.75	27.5	34.13	38.65	40
hsa-miR-210	19.63	27.08	32.33	30.52	21.56	29.9	30.93	32.79
hsa-miR-211-5p	36.02				36.77
hsa-miR-212-3p	25.87	33.96	35.01	35.69	28.64	35.52
hsa-miR-21-3p	24.47	32.79	32.49	35.3	25.13	34.28	32.99	35.83
hsa-miR-214-3p	21.16	32.74	27.66	31.57	23.01	35.12	29.92	32.16
hsa-miR-215	16.01	24	29.14	27.28	19.85	27.86	32.26	31.73
hsa-miR-21-5p	12.48	22.24	20.86	23.66	13.68	24.64	22.74	25.13
hsa-miR-216a-5p	29.61	40	36.4	40	32.68	40	40	39.28
hsa-miR-216b	32.57				36.9	40	40	40
hsa-miR-217	28.66	36.77	35.04		31.74
hsa-miR-218-5p	23.89	36.11	31.23	35.31	26.8		35.09	34.65
hsa-miR-219-5p	25.58	33.12	34.3	37.1	27.61	34.16	36.81
hsa-miR-221-3p	19.81	27.47	29.18	30.35	21.35	29.31	30.26	31.74
hsa-miR-222-3p	18.94	26.69	27.19	29.47	19.57	29.21	29.75	30.85
hsa-miR-223-3p	18.22	29.29	26.2	28.38	19.74	30.37	29.01	30.06
hsa-miR-22-3p	21.76	29.72	29.22	31.77	22.9	34.51	30.44	32.21
hsa-miR-224-5p	21.91	29.91	34.26	33.49	27.27	38.3	36.71	36.68
hsa-miR-22-5p	24.32	35.99	33.21	35.09	26.06	35.27	32.93	35.29
hsa-miR-23a-3p	15.65	23.7	23.83	26.03	17.61	26.55	26.14	27.97
hsa-miR-23b-3p	16.67	24.79	24.74	27.21	18.93	27.87	27.32	29.21
hsa-miR-24-3p	15.76	23.64	23.81	25.85	17.79	27.03	26.05	27.64
hsa-miR-25-3p	19.67	28	29.72	31.24	22.01	29.76	32.25	32.92
hsa-miR-26a-2-3p	28.02	36.87	37.68		30.28	40	40	40
hsa-miR-26a-5p	16.49	24.98	24.6	27.58	18.49	28.17	27.36	29.1
hsa-miR-26b-5p	20.65	29.16	28.95	31.2	22.68	31.7	32.09	33.1
hsa-miR-27a-3p	17.14	25.26	25.57	27.58	19.08	28.16	27.96	29.6
hsa-miR-27b-3p	16.66	24.55	24.6	26.75	18.89	27.93	27.3	28.85
hsa-miR-28-5p	20.85	29.51	29.04	31.72	22.59	32.18	30.98	32.56
hsa-miR-296-5p	25.67	33.32	32.52	35.52	26.83	40	34.66	38.56
hsa-miR-298	33.01	37.05			33.49			40
hsa-miR-299-3p	31	40	40		33.99
hsa-miR-299-5p	26.56	39.14	33.52	38.25	27.96	40	33.87	40
hsa-miR-29a-3p	17.64	26.65	27.56	29.79	20.13	28.81	29.59	31.02
hsa-miR-29b-2-5p	24.87	32.51	31.93	34.69	27		34.99
hsa-miR-29b-3p	20.76	27.31	28.99	30.83	21.68	29.99	31.51	32.21
hsa-miR-29c-3p	18.77	27.15	27.62	30	21.13	30.02	30.01	31.25
hsa-miR-301a-3p	22.38	29.68	30.37	32.08	24.09	31.99	33.03	34.53
hsa-miR-301b	28.55	32.32	35.18	35.04	27.3	34.23
hsa-miR-302a-3p	34.8	40	40		35.23
hsa-miR-302b-3p	38.97				35.14
hsa-miR-302c-3p					40
hsa-miR-302c-5p	40			40	40		40
hsa-miR-302d-3p	35.77				36.79
hsa-miR-30a-5p	22.57	33.53	29.65	31.68	25.49	38.06	33.36	34.04
hsa-miR-30b-3p	30.9	40		40	32.9	40
hsa-miR-30b-5p	17.25	24.51	26.36	27.58	19.9	28.56	29.45	30.31
hsa-miR-30c-2-3p	29.27			36.87	32.12		40
hsa-miR-30c-5p	18.78	26.62	26.91	29.54	21.04	29.45	29.62	30.78
hsa-miR-30d-5p	21.16	28.54	31.09	31.68	24.05	32.48	33.9	35.25
hsa-miR-30e-3p	23.28	32.58	31.71	34.64	25.82	35.75	35.83	35.79
hsa-miR-30e-5p	19.63	27.16	27.96	29.77	21.39	30	30.45	31.67
hsa-miR-31-3p	24.73	31.35	33.92	34.55	25.98	36.67	34.96	36.97
hsa-miR-31-5p	21.35	28.12	30.97	31.53	22.85	33.7	32.14	35.06
hsa-miR-320a	18.59	26.32	26.93	28.61	19.91	27.45	29.18	30.11
hsa-miR-323a-3p	28.2		35.87	40	29.95	37.73	39.3	37.35
hsa-miR-324-3p	22.59	30.62	30.66	32.5	24.93	32.84	33.25	33.81
hsa-miR-324-5p	23.29	30.66	31.92	34.04	25.6	33.82	34.78	35.96
hsa-miR-325	38.36				40
hsa-miR-32-5p	24.32	28.45	31.05	31.79	25.7	30.93	32.16	32.85
hsa-miR-326	26.2	37.03	35.71	40	28.98	37.07	37.19
hsa-miR-328	25.15	34.74	32.45	35.24	27.2	37.37	36.16	36.11
hsa-miR-329	29.05	35.22	34.87	36.21	30.75	35.1	36.28	35.6
hsa-miR-330-3p	26.17	33.71	33.85	40	28.55		37.21
hsa-miR-331-3p	22.75	30.31	30.16	32.85	23.98	32.5	33.04	34.8
hsa-miR-335-5p	23.57	30.84	32.77	33.15	25.01	32.52	34.73	36.12
hsa-miR-337-3p	25.57		32.12	36.91	28.03		35.89
hsa-miR-337-5p	28.08	40	35.49	40	30.95	40	37.76	40
hsa-miR-338-3p	22.6	30.83	32.83	33.97	26.75	38.88	34.91	36.97
hsa-miR-339-5p	21.92	29.75	31.43	33.69	24.38	32	33.62	34.21
hsa-miR-33a-5p	27.11	28.28	32.34	31.99	27.72	30.9	34	35
hsa-miR-33b-5p	26.61	33.01	37.46	36.15	26.85	36.3		38.15
hsa-miR-340-5p	30.13	40	38.24	40	31.22	40		40
hsa-miR-342-3p	19.58	31.18	26.56	30.42	22	33.75	29.66	32.23
hsa-miR-345-5p	24.82	32.55	34.16	35.52	26.86	34.15	35.09	36.12
hsa-miR-346	29.97	34.83	34.76	35.34	33.46	34.83	36.62	35.1
hsa-miR-34a-5p	21.51	29.79	30.06	32.63	22.53	31.35	30.18	31.53
hsa-miR-34b-3p	29.55	40	35.84	40	31.08		40
hsa-miR-34c-3p	27.64	35.84	40	36.08	29.21	37.97	40	37.49
hsa-miR-34c-5p	27.84	36.75	34.34	36.63	29.52
hsa-miR-361-3p	24.82	33.05	34.58	35.38	27.11	38.44	35.03	36.74
hsa-miR-361-5p	19.67	27.19	28.51	30.07	22.46	30.52	30.6	31.93
hsa-miR-362-5p	25.29	32.87	35.98	36.8	28.77	37.81	38.2	37.47
hsa-miR-363-3p	29.36	37.2	38.2		24.6	31.89	36.6	35.36
hsa-miR-363-5p	40				35.64
hsa-miR-365a-3p	21.79	30.61	29.97	32.89	23.48	32.8	31.54	33.33
hsa-miR-367-3p	40				40
hsa-miR-369-5p	29.38	40	37.04	40	31.41		38.25
hsa-miR-370	26.65		33.51	35.7	29.34		36.81
hsa-miR-371a-3p	40				40
hsa-miR-371a-5p	33.45	40	40		34.8
hsa-miR-372	33.84				40
hsa-miR-373-3p	35.64				36.86	37.5		36.1
hsa-miR-373-5p	31.06	38.41	38.66	40	32.19	37.45	40	40
hsa-miR-374a-5p	20.84	30.23	29.61	32.18	23.8	33.51	32.22	33.8
hsa-miR-374b-3p	28.09	36.15	36.68		30.43	40
hsa-miR-374b-5p	20.19	29.18	29.67	32.04	23.57	32.66	32.61	33.69
hsa-miR-375	18.97	25.74	32.01	29.25	23.81	32.47	34.65
hsa-miR-376a-3p	25.55	37.41	32.18	36.34	26.96	40	34.77	37.24
hsa-miR-376b-3p	29.03	37.77	34.57	37.42	29.21		35.98
hsa-miR-376c-3p	23.82	36.68	31.09	34.73	25.31	37.29	34.17	35.74
hsa-miR-377-3p	28.81		35.72	39.18	30.37		36.23	40
hsa-miR-378a-3p	20.14	27.95	29.6	30.73	22.78	30.96	32.75	31.96
hsa-miR-379-5p	24.6		32.1	35.93	26.56		33.67	35.32
hsa-miR-381-3p	27.82		34.72		29.33		40
hsa-miR-382-5p	24.8	36.98	31.86	36.62	26.94		36.13	35.36
hsa-miR-383	32.68			36.26	40
hsa-miR-409-3p	24.24	34.14	31.08	34.43	26.63	40	34.52	36.29
hsa-miR-410	28.55		35.86		30.46
hsa-miR-411-5p	24.79	37.02	31.6	34.97	26.82	37.19	34.67
hsa-miR-412	40			40	40
hsa-miR-421	23.89	33.05	33.5	38.8	27.33	35.04	34.9	37.44
hsa-miR-422a	35.11	40			36.67
hsa-miR-423-3p	20.27	27.74	28.63	30.37	22.2	29.77	30.81	31.68
hsa-miR-423-5p	22.76	29.35	30.32	32.44	24.32	31.89	31.85	32.88
hsa-miR-424-5p	20.95	31.73	29.13	31.91	24.22	34.91	31.71	32.32
hsa-miR-425-3p	23.37	30.66	32.44	33.99	25.55	33.52	35.12	36.78
hsa-miR-425-5p	20.26	27.59	31.23	30.81	22.74	31.13	32.91	34.33
hsa-miR-429	18.87	25.86	31.51	28.93	22.11	29.7	33.51	33.98
hsa-miR-431-5p	27.7	34.84	34.76	36.24	28.87	39.37	36.49	40
hsa-miR-432-5p	28.49	40	35.43	37.38	30.72	40	40	40
hsa-miR-433	28.82	38.09	36.07	40	30.8		40	38.31
hsa-miR-449a	29.9				32.29
hsa-miR-449b-5p	34.61	40	40		36.03
hsa-miR-450a-5p	29.28	40	37.72	38.19	31.64	40	40	38.49
hsa-miR-451a	21.27	31.77	30.65	30.02	20.68	34.74	32.65	31.16
hsa-miR-452-5p	22.86	30.78	32.44	33.88	26.66	36.1	35.13	40
hsa-miR-454-3p	21.75	29.86	30.49	32.22	24.12	31.92	33.08	33.58
hsa-miR-455-5p	23.27	30.7	32.5	33.51	26.62	36.66	34.81	35.8
hsa-miR-483-3p	29.67	36.68	36.4	36.64	29.77	36.93	36.42
hsa-miR-484	21.82	29.88	29.8	31.88	23.7	31.71	32.08	32.35
hsa-miR-485-3p	28.12	38.09	35.08	37.72	29.25	40	37.41	40
hsa-miR-486-5p	26.55	35.53	35.65	35.59	26.58		37.79	36.13
hsa-miR-487b	27.16	40	34.1	40	29.14	39.99	39.4	37.26
hsa-miR-488-3p	36.12				40
hsa-miR-490-3p	31.72	32.71	31.91	32.45	31.81	32.75	32.35	32.76
hsa-miR-491-3p	30.77	37.8		40	33.64	40	40
hsa-miR-491-5p	24.61	32.12	32.92	34.9	27.09	34.73	36.4	36.03
hsa-miR-492	33.31				33.82
hsa-miR-493-3p	26.91	35.37	33.76	35.72	28.89		34.36	37.38
hsa-miR-494	29.51	40	37.45	40	32.21		40
hsa-miR-495-3p	25.85	35.08	32.98	34.66	27.94	34.89	34.65	35.74
hsa-miR-497-5p	22.77	32.82	30.08	32	24.7	37.47	31.61	33.23
hsa-miR-498	40			40
hsa-miR-499a-5p	27.87	35.83			31.18
hsa-miR-500a-5p	23.93	31.2	32.83	35.81	26.87	35.03	35.36	37.27
hsa-miR-501-5p	25.22	32.43	33.58	36.72	27.79	40	34.85	36.76
hsa-miR-502-5p	23.89	30.07	32.05	32.54	25.59	32.23	33.51	35.22
hsa-miR-503-5p	27.75	35.8	36.19	36.21	30.14			36.88
hsa-miR-505-3p	23.57	31.7	32.28	34.08	26.04	36.64	34.48	36.97
hsa-miR-506-3p	30.5	40	40	40	33.96
hsa-miR-508-3p	30.06	39.35	40	40	36.6			40
hsa-miR-509-3-5p	29.32		40	40	40	40	40	40
hsa-miR-509-3p	26.75	36.16	36.16	40	32.85	40		36.65
hsa-miR-510	30.45	36.48	40	38.01	33.57	37.7	39.06
hsa-miR-512-5p	36.2	40			38.49	40
hsa-miR-513a-5p	34.5	40	40	40	38.54	40
hsa-miR-514a-3p	26	35.12	35.86	36.32	31.9		40
hsa-miR-516a-5p	37.06
hsa-miR-516b-5p	35.97				40
hsa-miR-517a-3p	33.17	40			35.2
hsa-miR-517c-3p	32.96				37.34	40		40
hsa-miR-518a-3p	34.53				36.03
hsa-miR-518b	36.07				39.03
hsa-miR-518c-3p	34.93				40
hsa-miR-518c-5p	32.55	40			34.47
hsa-miR-518e-3p	33.21				36.14	40
hsa-miR-518f-3p	32.32	40			35.56
hsa-miR-519a-3p	36.64
hsa-miR-519d	32.65				40
hsa-miR-520c-3p	32.97				36.86
hsa-miR-520d-5p	36.47			40	37.58
hsa-miR-521
hsa-miR-523-3p	40				40			38.07
hsa-miR-524-3p	35.94				37.7
hsa-miR-524-5p	35.01	40			40
hsa-miR-525-5p	32.83				36.07
hsa-miR-526b-5p	36.81				40
hsa-miR-532-5p	22.01	29.46	31.46	32.36	25.72	33.68	35.05	34.81
hsa-miR-539-5p	27.98	36.71	35.56		29.74		36.75	36.27
hsa-miR-542-5p	28.01	40	35.04		30.83	36.18	36.69	35.17
hsa-miR-545-3p	30.65	36.46	35.52	38.32	32.12	40	37.72	39.39
hsa-miR-548b-3p	31.87	38.15			35.73
hsa-miR-548c-3p	33.83	40		40	37.66			40
hsa-miR-549a	31.03			40	33.13
hsa-miR-550a-5p	28.05	35.16	40		30.92
hsa-miR-551b-3p	27.61		33.99	36.94	29.73			40
hsa-miR-557					40
hsa-miR-570-3p	29	34.73	36.27		31.1	40		40
hsa-miR-572	31.2	40	40	40	32.58		40	40
hsa-miR-574-3p	20.02	27.6	27.09	29.85	21.77	32.31	29.09	31.12
hsa-miR-576-3p	29.17	37.42	37.12		31.14	40	40
hsa-miR-576-5p	28.26	37.73	40	40	30.36
hsa-miR-582-5p	24.01	32.95	31.78	34.65	26.13	33.79	34.47	35.58
hsa-miR-583	36.53				36.27
hsa-miR-584-5p	26.92	34.22	38.07	38.32	28.13	34.17	39.15	37.68
hsa-miR-589-5p	29.34	40	37.34	40	31.77	40	40	40
hsa-miR-590-5p	22.67	31.29	32.14	34.1	25.13	33.04	35.24	36
hsa-miR-595	35.3	40	40	39.27	35.84	40	40	40
hsa-miR-596	30.96	38.48			33.31
hsa-miR-597	35.91		40	40	35.77
hsa-miR-598	26.09	36.93	34.03	36.95	25.28	34.03	35.94	37.1
hsa-miR-602	29.76	39.07	38.27		31.55	40		39.58
hsa-miR-608	37.91				40
hsa-miR-615-3p	31.35	40	40	37.83	29.84	40	36.59	40
hsa-miR-617	35.76			40	38.24
hsa-miR-620	40				40
hsa-miR-622	29.19	37.72			30.97		40
hsa-miR-623	34.8	40			37.72		40
hsa-miR-625-3p	25.91	32.57	36.28		26.56	36.97	36.88
hsa-miR-627	27.93	35.63	39.33	40	29.61	38.59
hsa-miR-628-3p	26.94	35.39	35.12	36.64	28.88	40	37.29
hsa-miR-629-5p	25.39	32.47	36.95	36.32	27.46	35.5	35.63	36.14
hsa-miR-631	32.1	40		40	34.58
hsa-miR-637	34.31				35.08		40
hsa-miR-642a-5p	27.61	35.6	35.8	38.35	29.05	40	39.61
hsa-miR-651	27.21	35.77	35.08		29.35
hsa-miR-652-3p	22.8	30.33	31.86	32.86	25.43	33.28	33.95	33.97
hsa-miR-654-5p	28.83	40	36.14	40	31.08	40	40	40
hsa-miR-658	34.95				38.93
hsa-miR-660-5p	21.06	28.55	30.16	32.56	24.48	34.03	32.6	36
hsa-miR-662	30.85	38.04	37.68	40	32.87	38.13	40	40
hsa-miR-663a	25.1	33.6	34.65	34.6	25	33.55	34.32	36.09
hsa-miR-665	24.48	32.53	34.77	36.18	27.28	33.41	35	34.72
hsa-miR-668	33.54				34.71
hsa-miR-671-5p	26.53	32.72	34.68	34.94	27.81	35.91	36.8	38.1
hsa-miR-708-5p	21.75	34.74	29.03	33.18	23.06	36.8	30.46	33.57
hsa-miR-744-5p	24.89	32.75	34.2	35.25	27.09	34.75	35.89	39.35
hsa-miR-7-5p	21.78	30.19	34.64	33.83	24.78	31.82	34.95	35.52
hsa-miR-760	30.46	40	36.85	40	31.88	40	40	40
hsa-miR-765	31.53			40	33.24
hsa-miR-766-3p	25.28	33.97	32.25	35.87	27.72		37.63	36.05
hsa-miR-802	40					40
hsa-miR-873-5p	34.26				35.44
hsa-miR-874	22.62	32.39	29.96	33.55	25.05	37.42	32.52	33.82
hsa-miR-877-5p	25.2	34.65	33.84	40	26.01	34.89	36.48	36.73
hsa-miR-885-5p	32.11		37.93	40	33.86
hsa-miR-887	27.16	36.46	34.02	35.7	30.17	37.15	37.69	37.92
hsa-miR-888-5p	36.04				38.06
hsa-miR-890	35.63	40			37.79
hsa-miR-891a	32.52				35.77
hsa-miR-921	40				38.09
hsa-miR-92a-3p	17.5	23.87	27.13	27.23	19.19	25.2	29.14	29.64
hsa-miR-92b-3p	23.9	30.7	32.09	33.69	26.12	34.12	34.6	36.08
hsa-miR-933	35.05				37.28
hsa-miR-934	31.8	34.83	35.92	36.78	34.21	35.54	35.79	36.32
hsa-miR-93-5p	17.8	25.44	28.47	28.66	20.33	27.01	30.52	31.06
hsa-miR-9-3p	30.11	40	38.19		31.89
hsa-miR-940	22.31	27.35	30.31	33.37	23.82	31.81	32.83	34.15
hsa-miR-95	20.9	28.04	32.98	31.24	27.16	33.61	35.64	35.72
hsa-miR-9-5p	27.7	36.56	35.36		28.77	40	37.79	37.49
hsa-miR-96-3p	31.68		40		33.88		40
hsa-miR-96-5p	21.96	28.75	34.55	32.24	24.08	30.97	34.18	36.42
hsa-miR-98-5p	24.35	33.65	33.6	35.65	26.13	35.7	36.76	36.94
hsa-miR-99a-3p	25.77		31.59		29.25		35.27
hsa-miR-99a-5p	19.16	32.11	26.01	30.9	23.16	34.73	31.19	34.02
hsa-miR-99b-5p	20.83	32.73	28.28	31.15	23.05	33.26	31.48	32.63
SNORD38B	16.85	23.21	25.76	25.96	18.61	25.83	27.32	27.12
SNORD49A	16.23	21.79	24.76	25.07	18.13	24.85	26.73	26.64
U6 snRNA	22.59	24.69	27.64	31.15	23.79	28.05	29.46	28.84
UniSp2	18.06	18.48	18.49	18.63	17.3	17.94	17.73	17.7
cel-miR-39-3p	26.85	26.49	26.62	26.62	26.68	26.61	26.57	26.49
UniSp3 IPC	21.85	21.8	21.89	21.91	21.83	21.93	21.76	21.78
UniSp3 IPC	21.48	21.44	21.5	21.54	21.23	21.48	21.53	21.33
UniSp3 IPC	21.97	21.87	21.95	22.05	21.88	21.93	21.91	21.88
UniSp4	24.78	24.92	25.2	25.15	24.08	24.62	24.33	24.13
UniSp5	32.08	32.73	32.65	32.3	31.54	31.81	31.84	31.89
UniSp6	40	40			40	40	40
Blank (H2O)
	CRC replicate #1				CRC replicate #2
	Whole Tumor	Tumor	Stroma	TEC	Whole Tumor	Tumor	Stroma	TEC
< Limit of detection	3	74	78	89	5	118	104	121
< Limit of quantification (Cq=40)	10	41	19	43	20	41	31	30
microRNAs detected	359	257	275	240	347	213	237	221

## Sheet: Filtered Raw (Cq) Data
Filtered Raw Data
Avg Cq compartments < 38	empty values set to 40
Sample ID	CC_R1	TT_R1	ST_R1	TEC_R1	CC_R2	TT_R2	ST_R2	TEC_R2
Replicate	1	1	1	1	2	2	2	2
Compartment	Whole Tumor	TT	ST	TEC	Whole Tumor	TT	ST	TEC
cel-miR-39-3p	26.85	26.49	26.62	26.62	26.68	26.61	26.57	26.49
hsa-let-7a-5p	15.6	23.34	23.7	25.99	17.5	26.12	26.06	27.65
hsa-let-7b-5p	18.35	25.61	25.06	27.65	19.52	27.53	27.64	28.92
hsa-let-7c	18.91	27.17	26.56	30.08	20.99	30.08	30.04	31.36
hsa-let-7d-3p	21.95	28.69	29.01	31.66	23.8	30.8	31.79	33.6
hsa-let-7d-5p	19.78	27.82	28.64	30.56	22.03	30.01	30.98	31.98
hsa-let-7e-5p	20.62	30.92	27.58	30.18	22.31	32.6	30.21	30.59
hsa-let-7f-5p	18.69	27.12	28.5	30.8	20.91	30.32	30.6	31.97
hsa-let-7g-5p	17.12	25.16	25.99	27.84	19.7	28.44	28.46	29.76
hsa-let-7i-5p	19.45	28.53	26.91	29.69	21.09	31.15	28.46	30.3
hsa-miR-1	24.79	36.79	31.89	34.52	30.24	40	40	40
hsa-miR-100-5p	18.96	32.76	25.81	30.15	20.94	33.37	28.49	31.54
hsa-miR-101-3p	19.94	27.54	27.6	29.97	21.35	30.7	30.36	32.38
hsa-miR-103a-3p	16.82	24.03	25.67	27.08	19.51	26.97	28.09	28.95
hsa-miR-106a-5p	16.86	23.94	27.85	27.03	18.91	25.13	28.79	29.13
hsa-miR-106b-5p	19.49	26.17	28.86	29.45	21.47	27.91	30.34	31.24
hsa-miR-107	18.3	25.56	27.56	28.71	21.05	28.33	29.78	30.74
hsa-miR-10a-5p	19.68	28.59	29.49	31.51	22.13	29.28	32.53	33.74
hsa-miR-10b-5p	20.02	30.72	27.97	29.29	22.08	30.07	29.98	31.05
hsa-miR-122-5p	28.49	36.21	35.5	40	30.61	40	40	40
hsa-miR-124-3p	28.99	36.15	34.79	37.19	32.68	40	40	36.97
hsa-miR-125a-5p	18.52	29.75	25.49	28.39	20.49	30.68	27.9	29.2
hsa-miR-125b-5p	16.53	29.11	23.01	27.26	18.7	31.6	26.45	28.93
hsa-miR-126-3p	17	29.65	24.69	25.75	20.71	32.17	28.44	26.96
hsa-miR-126-5p	18.93	32.3	27.1	28.32	23	34.62	31.23	30.15
hsa-miR-127-3p	22.45	34.62	29.17	33.28	24.66	34.88	31.76	33.37
hsa-miR-128	24.04	30.88	32.26	33.03	24.89	30.55	32.52	32.89
hsa-miR-130a-3p	22.56	34.72	30.46	33.3	25.45	36.8	33.12	34.49
hsa-miR-130b-3p	24.08	32.09	35.47	35.56	26.6	34.14	36.85	37.62
hsa-miR-132-3p	22.08	30.66	30.31	32.56	24.92	33.91	33	33.06
hsa-miR-133a	24.13	35.34	30.04	33.71	29.28	40	35.98	35.33
hsa-miR-133b	24.58	35.93	30.97	33.27	29.46	40	38.2	36.02
hsa-miR-134	27.3	35.15	34.2	35.19	29.62	37.09	35.79	36.11
hsa-miR-135a-5p	23.43	30.27	36.26	33.75	24.68	33.49	36.67	37.27
hsa-miR-135b-5p	19.53	26.68	33.05	30.01	21.06	29.55	33.13	34.14
hsa-miR-136-5p	26.44	34.49	29.52	32.44	27.82	36	31.91	33.61
hsa-miR-138-5p	27.66	40	35.71	38.25	28.99	40	36.01	40
hsa-miR-139-5p	25.48	34.28	33.51	36.02	28.75	40	35.19	35.99
hsa-miR-140-3p	20.63	30.03	28.25	30.67	23.15	33.02	31.3	32.84
hsa-miR-140-5p	22	31.09	29.77	31.84	24.43	33.93	32.05	32.8
hsa-miR-141-3p	16.35	23.04	28.06	26.63	17.1	25.57	29.16	29.14
hsa-miR-142-3p	17.5	28.4	24.85	28.66	19.39	30.36	28.16	29.9
hsa-miR-142-5p	25.35	34.51	30.19	33.71	26.21	35.18	33.33	35.15
hsa-miR-143-3p	17.27	29.67	24.93	26.99	20.07	32.23	27.79	29.17
hsa-miR-144-3p	29.8	35.45	35.51	35.5	27.34	40	40	37.35
hsa-miR-145-5p	16.31	28.13	22.58	25.75	18.88	31.09	26.09	27.8
hsa-miR-146a-5p	19.85	29.68	29	31.57	22.62	32.14	31.37	33.13
hsa-miR-146b-5p	21.08	32.97	29.22	32.51	22.89	34.1	32.06	33.54
hsa-miR-147a	31.09	35.67	40	40	33.79	40	40	40
hsa-miR-147b	28.51	34.66	40	40	30.47	36.85	40	40
hsa-miR-148a-3p	17.01	24.43	27.38	27.87	21.21	30	29.52	31.05
hsa-miR-148b-3p	21.72	28.76	29.99	31.69	23.67	31.71	32.1	32.99
hsa-miR-149-5p	24.71	33.88	32.64	34.2	27.46	33.87	34.2	40
hsa-miR-150-5p	18.57	30.04	26.89	29.95	22.56	34.68	30.82	32.95
hsa-miR-151a-3p	20.99	28.97	31.03	31.7	23.89	33.07	33.12	34.54
hsa-miR-151a-5p	19.33	26.97	28.71	29.98	21.78	30.89	30.94	31.77
hsa-miR-152	20.61	30.87	27.72	30.83	22.56	33.07	29.76	31.97
hsa-miR-153	24.38	30.2	35.68	33.62	27.57	33.79	35.68	37.04
hsa-miR-154-5p	23.83	36.4	30.75	34.57	25.99	40	33.03	40
hsa-miR-155-5p	21.15	32.82	29.83	32.77	23.1	31.33	32.03	33.62
hsa-miR-15a-5p	18.54	25.7	27.36	28.47	20.73	27.52	28.95	29.87
hsa-miR-15b-5p	19.59	27.18	28.82	30.59	22.26	29.85	31.57	32.23
hsa-miR-16-1-3p	24.82	32.52	32.84	32.42	27.03	32.5	33.92	32.99
hsa-miR-16-5p	15.08	22.89	24.09	25.49	17.45	24.94	26.16	27.24
hsa-miR-17-5p	22.17	28.98	33.87	32.08	24.22	30.48	35.34	34.54
hsa-miR-181a-3p	25.57	37.21	34.46	40	26.9	35.63	35.95	40
hsa-miR-181a-5p	18.61	27.61	26.67	29.07	20.03	27.48	28.67	29.76
hsa-miR-181b-5p	22.04	31.89	31.26	33.8	23.18	31.65	33.52	34.35
hsa-miR-181c-5p	24.63	32.97	33.01	35.91	27.15	34.04	35.96	36.58
hsa-miR-181d	24.72	32.79	32.99	34.72	26.94	33.26	35.73	38.44
hsa-miR-182-5p	20.96	28.86	35.68	32.55	23.38	31.26	36.41	37.28
hsa-miR-183-5p	22.07	30.14	36.89	33.31	24.34	32.37	37.02	37.89
hsa-miR-185-5p	21.99	30.4	31.05	32.78	24.25	33.8	32.65	34.97
hsa-miR-186-5p	20.12	28.66	28.92	30.78	22.55	31.15	31.7	32.79
hsa-miR-187-3p	30.79	40	38.81	35.9	32.06	40	40	40
hsa-miR-188-5p	26.89	33.59	35.96	37	30.76	37.18	38.22	37.92
hsa-miR-18a-3p	24.12	31.68	34.94	34.89	26.38	33.24	36.46	38.15
hsa-miR-18a-5p	20.37	27.8	31.28	30.58	23.01	29.67	33.59	32.69
hsa-miR-18b-5p	20.16	27.62	31.48	30.21	22.69	29.46	32.64	32.16
hsa-miR-190a	25.56	32.96	34.44	35.77	28.06	40	40	38.36
hsa-miR-191-5p	18.92	26.45	28.87	29.67	21.75	29.8	31.25	32.97
hsa-miR-192-5p	15.19	22.8	27.96	26.15	18.91	26.59	30.61	30.16
hsa-miR-193a-3p	26.82	35.42	35.24	37.92	28.21	36.98	37.98	40
hsa-miR-193a-5p	25.63	34.15	33.15	34.95	25.88	35.02	34.76	35.52
hsa-miR-193b-3p	20.67	29.84	28.48	31.66	22.16	30.59	29.47	32.37
hsa-miR-194-5p	15.31	23.26	28.53	26.74	19.08	26.8	31.25	31.01
hsa-miR-195-5p	20.25	30.68	27.12	29.49	21.76	34.37	29.18	30.7
hsa-miR-196a-5p	20.74	29.38	33.78	33.02	24.24	31.03	36.22	35.18
hsa-miR-196b-5p	18.25	26.73	28.57	29.88	21.81	29.06	32.33	33.16
hsa-miR-197-3p	21.25	29.08	29.21	31.49	22.99	31.14	31.74	32.58
hsa-miR-199a-3p	18.27	31.14	25.88	29.32	20.36	33.88	27.95	30.25
hsa-miR-199a-5p	20.47	32.09	26.96	30.78	22.05	34.27	28.52	30.75
hsa-miR-199b-5p	20.79	31.29	27.05	31.08	22.6	34.59	28.85	32.35
hsa-miR-19a-3p	19.63	23.61	26.74	26.58	18.83	25.06	28.64	29.09
hsa-miR-19b-3p	17.87	22.5	25.58	25.31	17.59	23.95	27.33	27.92
hsa-miR-200a-3p	18.32	24.83	31.04	28.32	20.45	27.81	31.91	31.89
hsa-miR-200b-3p	15.41	23.19	29.87	26.85	18.49	26.83	31.54	31.24
hsa-miR-200c-3p	15.01	22.78	27.88	26.18	16.9	25.34	29.01	28.81
hsa-miR-203a	19.12	26.19	32.87	29.22	22.83	31.38	33.75	32.83
hsa-miR-204-5p	24	33.79	35.6	37	29.57	35.3	40	37.48
hsa-miR-205-5p	32.96	40	34.04	40	22.74	34.08	34.01	32.14
hsa-miR-206	31.08	37.6	36.44	38.41	39.04	36.67	37.14	37.27
hsa-miR-20a-5p	16.24	23.33	27.32	26.49	18.24	24.53	28.34	28.84
hsa-miR-210	19.63	27.08	32.33	30.52	21.56	29.9	30.93	32.79
hsa-miR-212-3p	25.87	33.96	35.01	35.69	28.64	35.52	40	40
hsa-miR-21-3p	24.47	32.79	32.49	35.3	25.13	34.28	32.99	35.83
hsa-miR-214-3p	21.16	32.74	27.66	31.57	23.01	35.12	29.92	32.16
hsa-miR-215	16.01	24	29.14	27.28	19.85	27.86	32.26	31.73
hsa-miR-21-5p	12.48	22.24	20.86	23.66	13.68	24.64	22.74	25.13
hsa-miR-217	28.66	36.77	35.04	40	31.74	40	40	40
hsa-miR-218-5p	23.89	36.11	31.23	35.31	26.8	40	35.09	34.65
hsa-miR-219-5p	25.58	33.12	34.3	37.1	27.61	34.16	36.81	40
hsa-miR-221-3p	19.81	27.47	29.18	30.35	21.35	29.31	30.26	31.74
hsa-miR-222-3p	18.94	26.69	27.19	29.47	19.57	29.21	29.75	30.85
hsa-miR-223-3p	18.22	29.29	26.2	28.38	19.74	30.37	29.01	30.06
hsa-miR-22-3p	21.76	29.72	29.22	31.77	22.9	34.51	30.44	32.21
hsa-miR-224-5p	21.91	29.91	34.26	33.49	27.27	38.3	36.71	36.68
hsa-miR-22-5p	24.32	35.99	33.21	35.09	26.06	35.27	32.93	35.29
hsa-miR-23a-3p	15.65	23.7	23.83	26.03	17.61	26.55	26.14	27.97
hsa-miR-23b-3p	16.67	24.79	24.74	27.21	18.93	27.87	27.32	29.21
hsa-miR-24-3p	15.76	23.64	23.81	25.85	17.79	27.03	26.05	27.64
hsa-miR-25-3p	19.67	28	29.72	31.24	22.01	29.76	32.25	32.92
hsa-miR-26a-5p	16.49	24.98	24.6	27.58	18.49	28.17	27.36	29.1
hsa-miR-26b-5p	20.65	29.16	28.95	31.2	22.68	31.7	32.09	33.1
hsa-miR-27a-3p	17.14	25.26	25.57	27.58	19.08	28.16	27.96	29.6
hsa-miR-27b-3p	16.66	24.55	24.6	26.75	18.89	27.93	27.3	28.85
hsa-miR-28-5p	20.85	29.51	29.04	31.72	22.59	32.18	30.98	32.56
hsa-miR-296-5p	25.67	33.32	32.52	35.52	26.83	40	34.66	38.56
hsa-miR-299-5p	26.56	39.14	33.52	38.25	27.96	40	33.87	40
hsa-miR-29a-3p	17.64	26.65	27.56	29.79	20.13	28.81	29.59	31.02
hsa-miR-29b-2-5p	24.87	32.51	31.93	34.69	27	40	34.99	40
hsa-miR-29b-3p	20.76	27.31	28.99	30.83	21.68	29.99	31.51	32.21
hsa-miR-29c-3p	18.77	27.15	27.62	30	21.13	30.02	30.01	31.25
hsa-miR-301a-3p	22.38	29.68	30.37	32.08	24.09	31.99	33.03	34.53
hsa-miR-301b	28.55	32.32	35.18	35.04	27.3	34.23	40	40
hsa-miR-30a-5p	22.57	33.53	29.65	31.68	25.49	38.06	33.36	34.04
hsa-miR-30b-5p	17.25	24.51	26.36	27.58	19.9	28.56	29.45	30.31
hsa-miR-30c-5p	18.78	26.62	26.91	29.54	21.04	29.45	29.62	30.78
hsa-miR-30d-5p	21.16	28.54	31.09	31.68	24.05	32.48	33.9	35.25
hsa-miR-30e-3p	23.28	32.58	31.71	34.64	25.82	35.75	35.83	35.79
hsa-miR-30e-5p	19.63	27.16	27.96	29.77	21.39	30	30.45	31.67
hsa-miR-31-3p	24.73	31.35	33.92	34.55	25.98	36.67	34.96	36.97
hsa-miR-31-5p	21.35	28.12	30.97	31.53	22.85	33.7	32.14	35.06
hsa-miR-320a	18.59	26.32	26.93	28.61	19.91	27.45	29.18	30.11
hsa-miR-324-3p	22.59	30.62	30.66	32.5	24.93	32.84	33.25	33.81
hsa-miR-324-5p	23.29	30.66	31.92	34.04	25.6	33.82	34.78	35.96
hsa-miR-32-5p	24.32	28.45	31.05	31.79	25.7	30.93	32.16	32.85
hsa-miR-326	26.2	37.03	35.71	40	28.98	37.07	37.19	40
hsa-miR-328	25.15	34.74	32.45	35.24	27.2	37.37	36.16	36.11
hsa-miR-329	29.05	35.22	34.87	36.21	30.75	35.1	36.28	35.6
hsa-miR-330-3p	26.17	33.71	33.85	40	28.55	40	37.21	40
hsa-miR-331-3p	22.75	30.31	30.16	32.85	23.98	32.5	33.04	34.8
hsa-miR-335-5p	23.57	30.84	32.77	33.15	25.01	32.52	34.73	36.12
hsa-miR-337-3p	25.57	40	32.12	36.91	28.03	40	35.89	40
hsa-miR-338-3p	22.6	30.83	32.83	33.97	26.75	38.88	34.91	36.97
hsa-miR-339-5p	21.92	29.75	31.43	33.69	24.38	32	33.62	34.21
hsa-miR-33a-5p	27.11	28.28	32.34	31.99	27.72	30.9	34	35
hsa-miR-33b-5p	26.61	33.01	37.46	36.15	26.85	36.3	40	38.15
hsa-miR-342-3p	19.58	31.18	26.56	30.42	22	33.75	29.66	32.23
hsa-miR-345-5p	24.82	32.55	34.16	35.52	26.86	34.15	35.09	36.12
hsa-miR-346	29.97	34.83	34.76	35.34	33.46	34.83	36.62	35.1
hsa-miR-34a-5p	21.51	29.79	30.06	32.63	22.53	31.35	30.18	31.53
hsa-miR-34c-3p	27.64	35.84	40	36.08	29.21	37.97	40	37.49
hsa-miR-34c-5p	27.84	36.75	34.34	36.63	29.52	40	40	40
hsa-miR-361-3p	24.82	33.05	34.58	35.38	27.11	38.44	35.03	36.74
hsa-miR-361-5p	19.67	27.19	28.51	30.07	22.46	30.52	30.6	31.93
hsa-miR-362-5p	25.29	32.87	35.98	36.8	28.77	37.81	38.2	37.47
hsa-miR-363-3p	29.36	37.2	38.2	40	24.6	31.89	36.6	35.36
hsa-miR-365a-3p	21.79	30.61	29.97	32.89	23.48	32.8	31.54	33.33
hsa-miR-370	26.65	40	33.51	35.7	29.34	40	36.81	40
hsa-miR-373-3p	35.64	40	40	40	36.86	37.5	40	36.1
hsa-miR-374a-5p	20.84	30.23	29.61	32.18	23.8	33.51	32.22	33.8
hsa-miR-374b-3p	28.09	36.15	36.68	40	30.43	40	40	40
hsa-miR-374b-5p	20.19	29.18	29.67	32.04	23.57	32.66	32.61	33.69
hsa-miR-375	18.97	25.74	32.01	29.25	23.81	32.47	34.65	40
hsa-miR-376a-3p	25.55	37.41	32.18	36.34	26.96	40	34.77	37.24
hsa-miR-376b-3p	29.03	37.77	34.57	37.42	29.21	40	35.98	40
hsa-miR-376c-3p	23.82	36.68	31.09	34.73	25.31	37.29	34.17	35.74
hsa-miR-377-3p	28.81	40	35.72	39.18	30.37	40	36.23	40
hsa-miR-378a-3p	20.14	27.95	29.6	30.73	22.78	30.96	32.75	31.96
hsa-miR-379-5p	24.6	40	32.1	35.93	26.56	40	33.67	35.32
hsa-miR-381-3p	27.82	40	34.72	40	29.33	40	40	40
hsa-miR-382-5p	24.8	36.98	31.86	36.62	26.94	40	36.13	35.36
hsa-miR-383	32.68	40	40	36.26	40	40	40	40
hsa-miR-409-3p	24.24	34.14	31.08	34.43	26.63	40	34.52	36.29
hsa-miR-410	28.55	40	35.86	40	30.46	40	40	40
hsa-miR-411-5p	24.79	37.02	31.6	34.97	26.82	37.19	34.67	40
hsa-miR-421	23.89	33.05	33.5	38.8	27.33	35.04	34.9	37.44
hsa-miR-423-3p	20.27	27.74	28.63	30.37	22.2	29.77	30.81	31.68
hsa-miR-423-5p	22.76	29.35	30.32	32.44	24.32	31.89	31.85	32.88
hsa-miR-424-5p	20.95	31.73	29.13	31.91	24.22	34.91	31.71	32.32
hsa-miR-425-3p	23.37	30.66	32.44	33.99	25.55	33.52	35.12	36.78
hsa-miR-425-5p	20.26	27.59	31.23	30.81	22.74	31.13	32.91	34.33
hsa-miR-429	18.87	25.86	31.51	28.93	22.11	29.7	33.51	33.98
hsa-miR-431-5p	27.7	34.84	34.76	36.24	28.87	39.37	36.49	40
hsa-miR-451a	21.27	31.77	30.65	30.02	20.68	34.74	32.65	31.16
hsa-miR-452-5p	22.86	30.78	32.44	33.88	26.66	36.1	35.13	40
hsa-miR-454-3p	21.75	29.86	30.49	32.22	24.12	31.92	33.08	33.58
hsa-miR-455-5p	23.27	30.7	32.5	33.51	26.62	36.66	34.81	35.8
hsa-miR-483-3p	29.67	36.68	36.4	36.64	29.77	36.93	36.42	40
hsa-miR-484	21.82	29.88	29.8	31.88	23.7	31.71	32.08	32.35
hsa-miR-486-5p	26.55	35.53	35.65	35.59	26.58	40	37.79	36.13
hsa-miR-490-3p	31.72	32.71	31.91	32.45	31.81	32.75	32.35	32.76
hsa-miR-491-5p	24.61	32.12	32.92	34.9	27.09	34.73	36.4	36.03
hsa-miR-493-3p	26.91	35.37	33.76	35.72	28.89	40	34.36	37.38
hsa-miR-495-3p	25.85	35.08	32.98	34.66	27.94	34.89	34.65	35.74
hsa-miR-497-5p	22.77	32.82	30.08	32	24.7	37.47	31.61	33.23
hsa-miR-499a-5p	27.87	35.83	40	40	31.18	40	40	40
hsa-miR-500a-5p	23.93	31.2	32.83	35.81	26.87	35.03	35.36	37.27
hsa-miR-501-5p	25.22	32.43	33.58	36.72	27.79	40	34.85	36.76
hsa-miR-502-5p	23.89	30.07	32.05	32.54	25.59	32.23	33.51	35.22
hsa-miR-503-5p	27.75	35.8	36.19	36.21	30.14	40	40	36.88
hsa-miR-505-3p	23.57	31.7	32.28	34.08	26.04	36.64	34.48	36.97
hsa-miR-509-3p	26.75	36.16	36.16	40	32.85	40	40	36.65
hsa-miR-514a-3p	26	35.12	35.86	36.32	31.9	40	40	40
hsa-miR-532-5p	22.01	29.46	31.46	32.36	25.72	33.68	35.05	34.81
hsa-miR-539-5p	27.98	36.71	35.56	40	29.74	40	36.75	36.27
hsa-miR-542-5p	28.01	40	35.04	40	30.83	36.18	36.69	35.17
hsa-miR-545-3p	30.65	36.46	35.52	38.32	32.12	40	37.72	39.39
hsa-miR-550a-5p	28.05	35.16	40	40	30.92	40	40	40
hsa-miR-551b-3p	27.61	40	33.99	36.94	29.73	40	40	40
hsa-miR-570-3p	29	34.73	36.27	40	31.1	40	40	40
hsa-miR-574-3p	20.02	27.6	27.09	29.85	21.77	32.31	29.09	31.12
hsa-miR-582-5p	24.01	32.95	31.78	34.65	26.13	33.79	34.47	35.58
hsa-miR-584-5p	26.92	34.22	38.07	38.32	28.13	34.17	39.15	37.68
hsa-miR-590-5p	22.67	31.29	32.14	34.1	25.13	33.04	35.24	36
hsa-miR-598	26.09	36.93	34.03	36.95	25.28	34.03	35.94	37.1
hsa-miR-625-3p	25.91	32.57	36.28	40	26.56	36.97	36.88	40
hsa-miR-628-3p	26.94	35.39	35.12	36.64	28.88	40	37.29	40
hsa-miR-629-5p	25.39	32.47	36.95	36.32	27.46	35.5	35.63	36.14
hsa-miR-642a-5p	27.61	35.6	35.8	38.35	29.05	40	39.61	40
hsa-miR-651	27.21	35.77	35.08	40	29.35	40	40	40
hsa-miR-652-3p	22.8	30.33	31.86	32.86	25.43	33.28	33.95	33.97
hsa-miR-660-5p	21.06	28.55	30.16	32.56	24.48	34.03	32.6	36
hsa-miR-663a	25.1	33.6	34.65	34.6	25	33.55	34.32	36.09
hsa-miR-665	24.48	32.53	34.77	36.18	27.28	33.41	35	34.72
hsa-miR-671-5p	26.53	32.72	34.68	34.94	27.81	35.91	36.8	38.1
hsa-miR-708-5p	21.75	34.74	29.03	33.18	23.06	36.8	30.46	33.57
hsa-miR-744-5p	24.89	32.75	34.2	35.25	27.09	34.75	35.89	39.35
hsa-miR-7-5p	21.78	30.19	34.64	33.83	24.78	31.82	34.95	35.52
hsa-miR-766-3p	25.28	33.97	32.25	35.87	27.72	40	37.63	36.05
hsa-miR-874	22.62	32.39	29.96	33.55	25.05	37.42	32.52	33.82
hsa-miR-877-5p	25.2	34.65	33.84	40	26.01	34.89	36.48	36.73
hsa-miR-887	27.16	36.46	34.02	35.7	30.17	37.15	37.69	37.92
hsa-miR-92a-3p	17.5	23.87	27.13	27.23	19.19	25.2	29.14	29.64
hsa-miR-92b-3p	23.9	30.7	32.09	33.69	26.12	34.12	34.6	36.08
hsa-miR-934	31.8	34.83	35.92	36.78	34.21	35.54	35.79	36.32
hsa-miR-93-5p	17.8	25.44	28.47	28.66	20.33	27.01	30.52	31.06
hsa-miR-940	22.31	27.35	30.31	33.37	23.82	31.81	32.83	34.15
hsa-miR-95	20.9	28.04	32.98	31.24	27.16	33.61	35.64	35.72
hsa-miR-9-5p	27.7	36.56	35.36	40	28.77	40	37.79	37.49
hsa-miR-96-5p	21.96	28.75	34.55	32.24	24.08	30.97	34.18	36.42
hsa-miR-98-5p	24.35	33.65	33.6	35.65	26.13	35.7	36.76	36.94
hsa-miR-99a-3p	25.77	40	31.59	40	29.25	40	35.27	40
hsa-miR-99a-5p	19.16	32.11	26.01	30.9	23.16	34.73	31.19	34.02
hsa-miR-99b-5p	20.83	32.73	28.28	31.15	23.05	33.26	31.48	32.63
SNORD38B	16.85	23.21	25.76	25.96	18.61	25.83	27.32	27.12
SNORD49A	16.23	21.79	24.76	25.07	18.13	24.85	26.73	26.64
U6 snRNA	22.59	24.69	27.64	31.15	23.79	28.05	29.46	28.84
UniSp2	18.06	18.48	18.49	18.63	17.3	17.94	17.73	17.7
UniSp3 IPC	21.85	21.8	21.89	21.91	21.83	21.93	21.76	21.78
UniSp3 IPC	21.48	21.44	21.5	21.54	21.23	21.48	21.53	21.33
UniSp3 IPC	21.97	21.87	21.95	22.05	21.88	21.93	21.91	21.88
UniSp4	24.78	24.92	25.2	25.15	24.08	24.62	24.33	24.13
UniSp5	32.08	32.73	32.65	32.3	31.54	31.81	31.84	31.89
Global Mean	22.7607	31.2641	31.2979	33.0166	24.9181	33.7693	33.5604	34.589

## Sheet: Normalized (dCq) Data
GlobalMean normalized data
delta Cq-values: Cq(miRNA) - Cq(Global-Mean)
Sample ID	CC_R1	TT_R1	ST_R1	TEC_R1	CC_R2	TT_R2	ST_R2	TEC_R2
Replicate	1	1	1	1	2	2	2	2
Compartment	Whole Tumor	TT	ST	TEC	Whole Tumor	TT	ST	TEC
hsa-let-7a-5p	7.1607	7.92411	7.59787	7.02659	7.41806	7.64934	7.50043	6.93903
hsa-let-7b-5p	4.4107	5.65411	6.23787	5.36659	5.39806	6.23934	5.92043	5.66903
hsa-let-7c	3.8507	4.09411	4.73787	2.93659	3.92806	3.68934	3.52043	3.22903
hsa-let-7d-3p	0.810698	2.57411	2.28787	1.35659	1.11806	2.96934	1.77043	0.989031
hsa-let-7d-5p	2.9807	3.44411	2.65787	2.45659	2.88806	3.75934	2.58043	2.60903
hsa-let-7e-5p	2.1407	0.344109	3.71787	2.83659	2.60806	1.16934	3.35043	3.99903
hsa-let-7f-5p	4.0707	4.14411	2.79787	2.21659	4.00806	3.44934	2.96043	2.61903
hsa-let-7g-5p	5.6407	6.10411	5.30787	5.17659	5.21806	5.32934	5.10043	4.82903
hsa-let-7i-5p	3.3107	2.73411	4.38787	3.32659	3.82806	2.61934	5.10043	4.28903
hsa-miR-1	-2.0293	-5.52589	-0.592132	-1.50341	-5.32194	-6.23066	-6.43957	-5.41097
hsa-miR-100-5p	3.8007	-1.49589	5.48787	2.86659	3.97806	0.399341	5.07043	3.04903
hsa-miR-101-3p	2.8207	3.72411	3.69787	3.04659	3.56806	3.06934	3.20043	2.20903
hsa-miR-103a-3p	5.9407	7.23411	5.62787	5.93659	5.40806	6.79934	5.47043	5.63903
hsa-miR-106a-5p	5.9007	7.32411	3.44787	5.98659	6.00806	8.63934	4.77043	5.45903
hsa-miR-106b-5p	3.2707	5.09411	2.43787	3.56659	3.44806	5.85934	3.22043	3.34903
hsa-miR-107	4.4607	5.70411	3.73787	4.30659	3.86806	5.43934	3.78043	3.84903
hsa-miR-10a-5p	3.0807	2.67411	1.80787	1.50659	2.78806	4.48934	1.03043	0.849031
hsa-miR-10b-5p	2.7407	0.544109	3.32787	3.72659	2.83806	3.69934	3.58043	3.53903
hsa-miR-122-5p	-5.7293	-4.94589	-4.20213	-6.98341	-5.69194	-6.23066	-6.43957	-5.41097
hsa-miR-124-3p	-6.2293	-4.88589	-3.49213	-4.17341	-7.76194	-6.23066	-6.43957	-2.38097
hsa-miR-125a-5p	4.2407	1.51411	5.80787	4.62659	4.42806	3.08934	5.66043	5.38903
hsa-miR-125b-5p	6.2307	2.15411	8.28787	5.75659	6.21806	2.16934	7.11043	5.65903
hsa-miR-126-3p	5.7607	1.61411	6.60787	7.26659	4.20806	1.59934	5.12043	7.62903
hsa-miR-126-5p	3.8307	-1.03589	4.19787	4.69659	1.91806	-0.850659	2.33043	4.43903
hsa-miR-127-3p	0.310698	-3.35589	2.12787	-0.263411	0.258062	-1.11066	1.80043	1.21903
hsa-miR-128	-1.2793	0.384109	-0.962132	-0.0134109	0.028062	3.21934	1.04043	1.69903
hsa-miR-130a-3p	0.200698	-3.45589	0.837868	-0.283411	-0.531938	-3.03066	0.440426	0.099031
hsa-miR-130b-3p	-1.3193	-0.825891	-4.17213	-2.54341	-1.68194	-0.370659	-3.28957	-3.03097
hsa-miR-132-3p	0.680698	0.604109	0.987868	0.456589	-0.00193798	-0.140659	0.560426	1.52903
hsa-miR-133a	-1.3693	-4.07589	1.25787	-0.693411	-4.36194	-6.23066	-2.41957	-0.740969
hsa-miR-133b	-1.8193	-4.66589	0.327868	-0.253411	-4.54194	-6.23066	-4.63957	-1.43097
hsa-miR-134	-4.5393	-3.88589	-2.90213	-2.17341	-4.70194	-3.32066	-2.22957	-1.52097
hsa-miR-135a-5p	-0.669302	0.994109	-4.96213	-0.733411	0.238062	0.279341	-3.10957	-2.68097
hsa-miR-135b-5p	3.2307	4.58411	-1.75213	3.00659	3.85806	4.21934	0.430426	0.449031
hsa-miR-136-5p	-3.6793	-3.22589	1.77787	0.576589	-2.90194	-2.23066	1.65043	0.979031
hsa-miR-138-5p	-4.8993	-8.73589	-4.41213	-5.23341	-4.07194	-6.23066	-2.44957	-5.41097
hsa-miR-139-5p	-2.7193	-3.01589	-2.21213	-3.00341	-3.83194	-6.23066	-1.62957	-1.40097
hsa-miR-140-3p	2.1307	1.23411	3.04787	2.34659	1.76806	0.749341	2.26043	1.74903
hsa-miR-140-5p	0.760698	0.174109	1.52787	1.17659	0.488062	-0.160659	1.51043	1.78903
hsa-miR-141-3p	6.4107	8.22411	3.23787	6.38659	7.81806	8.19934	4.40043	5.44903
hsa-miR-142-3p	5.2607	2.86411	6.44787	4.35659	5.52806	3.40934	5.40043	4.68903
hsa-miR-142-5p	-2.5893	-3.24589	1.10787	-0.693411	-1.29194	-1.41066	0.230426	-0.560969
hsa-miR-143-3p	5.4907	1.59411	6.36787	6.02659	4.84806	1.53934	5.77043	5.41903
hsa-miR-144-3p	-7.0393	-4.18589	-4.21213	-2.48341	-2.42194	-6.23066	-6.43957	-2.76097
hsa-miR-145-5p	6.4507	3.13411	8.71787	7.26659	6.03806	2.67934	7.47043	6.78903
hsa-miR-146a-5p	2.9107	1.58411	2.29787	1.44659	2.29806	1.62934	2.19043	1.45903
hsa-miR-146b-5p	1.6807	-1.70589	2.07787	0.506589	2.02806	-0.330659	1.50043	1.04903
hsa-miR-147a	-8.3293	-4.40589	-8.70213	-6.98341	-8.87194	-6.23066	-6.43957	-5.41097
hsa-miR-147b	-5.7493	-3.39589	-8.70213	-6.98341	-5.55194	-3.08066	-6.43957	-5.41097
hsa-miR-148a-3p	5.7507	6.83411	3.91787	5.14659	3.70806	3.76934	4.04043	3.53903
hsa-miR-148b-3p	1.0407	2.50411	1.30787	1.32659	1.24806	2.05934	1.46043	1.59903
hsa-miR-149-5p	-1.9493	-2.61589	-1.34213	-1.18341	-2.54194	-0.100659	-0.639574	-5.41097
hsa-miR-150-5p	4.1907	1.22411	4.40787	3.06659	2.35806	-0.910659	2.74043	1.63903
hsa-miR-151a-3p	1.7707	2.29411	0.267868	1.31659	1.02806	0.699341	0.440426	0.049031
hsa-miR-151a-5p	3.4307	4.29411	2.58787	3.03659	3.13806	2.87934	2.62043	2.81903
hsa-miR-152	2.1507	0.394109	3.57787	2.18659	2.35806	0.699341	3.80043	2.61903
hsa-miR-153	-1.6193	1.06411	-4.38213	-0.603411	-2.65194	-0.0206589	-2.11957	-2.45097
hsa-miR-154-5p	-1.0693	-5.13589	0.547868	-1.55341	-1.07194	-6.23066	0.530426	-5.41097
hsa-miR-155-5p	1.6107	-1.55589	1.46787	0.246589	1.81806	2.43934	1.53043	0.969031
hsa-miR-15a-5p	4.2207	5.56411	3.93787	4.54659	4.18806	6.24934	4.61043	4.71903
hsa-miR-15b-5p	3.1707	4.08411	2.47787	2.42659	2.65806	3.91934	1.99043	2.35903
hsa-miR-16-1-3p	-2.0593	-1.25589	-1.54213	0.596589	-2.11194	1.26934	-0.359574	1.59903
hsa-miR-16-5p	7.6807	8.37411	7.20787	7.52659	7.46806	8.82934	7.40043	7.34903
hsa-miR-17-5p	0.590698	2.28411	-2.57213	0.936589	0.698062	3.28934	-1.77957	0.049031
hsa-miR-181a-3p	-2.8093	-5.94589	-3.16213	-6.98341	-1.98194	-1.86066	-2.38957	-5.41097
hsa-miR-181a-5p	4.1507	3.65411	4.62787	3.94659	4.88806	6.28934	4.89043	4.82903
hsa-miR-181b-5p	0.720698	-0.625891	0.0378682	-0.783411	1.73806	2.11934	0.0404264	0.239031
hsa-miR-181c-5p	-1.8693	-1.70589	-1.71213	-2.89341	-2.23194	-0.270659	-2.39957	-1.99097
hsa-miR-181d	-1.9593	-1.52589	-1.69213	-1.70341	-2.02194	0.509341	-2.16957	-3.85097
hsa-miR-182-5p	1.8007	2.40411	-4.38213	0.466589	1.53806	2.50934	-2.84957	-2.69097
hsa-miR-183-5p	0.690698	1.12411	-5.59213	-0.293411	0.578062	1.39934	-3.45957	-3.30097
hsa-miR-185-5p	0.770698	0.864109	0.247868	0.236589	0.668062	-0.0306589	0.910426	-0.380969
hsa-miR-186-5p	2.6407	2.60411	2.37787	2.23659	2.36806	2.61934	1.86043	1.79903
hsa-miR-187-3p	-8.0293	-8.73589	-7.51213	-2.88341	-7.14194	-6.23066	-6.43957	-5.41097
hsa-miR-188-5p	-4.1293	-2.32589	-4.66213	-3.98341	-5.84194	-3.41066	-4.65957	-3.33097
hsa-miR-18a-3p	-1.3593	-0.415891	-3.64213	-1.87341	-1.46194	0.529341	-2.89957	-3.56097
hsa-miR-18a-5p	2.3907	3.46411	0.0178682	2.43659	1.90806	4.09934	-0.0295736	1.89903
hsa-miR-18b-5p	2.6007	3.64411	-0.182132	2.80659	2.22806	4.30934	0.920426	2.42903
hsa-miR-190a	-2.7993	-1.69589	-3.14213	-2.75341	-3.14194	-6.23066	-6.43957	-3.77097
hsa-miR-191-5p	3.8407	4.81411	2.42787	3.34659	3.16806	3.96934	2.31043	1.61903
hsa-miR-192-5p	7.5707	8.46411	3.33787	6.86659	6.00806	7.17934	2.95043	4.42903
hsa-miR-193a-3p	-4.0593	-4.15589	-3.94213	-4.90341	-3.29194	-3.21066	-4.41957	-5.41097
hsa-miR-193a-5p	-2.8693	-2.88589	-1.85213	-1.93341	-0.961938	-1.25066	-1.19957	-0.930969
hsa-miR-193b-3p	2.0907	1.42411	2.81787	1.35659	2.75806	3.17934	4.09043	2.21903
hsa-miR-194-5p	7.4507	8.00411	2.76787	6.27659	5.83806	6.96934	2.31043	3.57903
hsa-miR-195-5p	2.5107	0.584109	4.17787	3.52659	3.15806	-0.600659	4.38043	3.88903
hsa-miR-196a-5p	2.0207	1.88411	-2.48213	-0.00341085	0.678062	2.73934	-2.65957	-0.590969
hsa-miR-196b-5p	4.5107	4.53411	2.72787	3.13659	3.10806	4.70934	1.23043	1.42903
hsa-miR-197-3p	1.5107	2.18411	2.08787	1.52659	1.92806	2.62934	1.82043	2.00903
hsa-miR-199a-3p	4.4907	0.124109	5.41787	3.69659	4.55806	-0.110659	5.61043	4.33903
hsa-miR-199a-5p	2.2907	-0.825891	4.33787	2.23659	2.86806	-0.500659	5.04043	3.83903
hsa-miR-199b-5p	1.9707	-0.0258915	4.24787	1.93659	2.31806	-0.820659	4.71043	2.23903
hsa-miR-19a-3p	3.1307	7.65411	4.55787	6.43659	6.08806	8.70934	4.92043	5.49903
hsa-miR-19b-3p	4.8907	8.76411	5.71787	7.70659	7.32806	9.81934	6.23043	6.66903
hsa-miR-200a-3p	4.4407	6.43411	0.257868	4.69659	4.46806	5.95934	1.65043	2.69903
hsa-miR-200b-3p	7.3507	8.07411	1.42787	6.16659	6.42806	6.93934	2.02043	3.34903
hsa-miR-200c-3p	7.7507	8.48411	3.41787	6.83659	8.01806	8.42934	4.55043	5.77903
hsa-miR-203a	3.6407	5.07411	-1.57213	3.79659	2.08806	2.38934	-0.189574	1.75903
hsa-miR-204-5p	-1.2393	-2.52589	-4.30213	-3.98341	-4.65194	-1.53066	-6.43957	-2.89097
hsa-miR-205-5p	-10.1993	-8.73589	-2.74213	-6.98341	2.17806	-0.310659	-0.449574	2.44903
hsa-miR-206	-8.3193	-6.33589	-5.14213	-5.39341	-14.1219	-2.90066	-3.57957	-2.68097
hsa-miR-20a-5p	6.5207	7.93411	3.97787	6.52659	6.67806	9.23934	5.22043	5.74903
hsa-miR-210	3.1307	4.18411	-1.03213	2.49659	3.35806	3.86934	2.63043	1.79903
hsa-miR-212-3p	-3.1093	-2.69589	-3.71213	-2.67341	-3.72194	-1.75066	-6.43957	-5.41097
hsa-miR-21-3p	-1.7093	-1.52589	-1.19213	-2.28341	-0.211938	-0.510659	0.570426	-1.24097
hsa-miR-214-3p	1.6007	-1.47589	3.63787	1.44659	1.90806	-1.35066	3.64043	2.42903
hsa-miR-215	6.7507	7.26411	2.15787	5.73659	5.06806	5.90934	1.30043	2.85903
hsa-miR-21-5p	10.2807	9.02411	10.4379	9.35659	11.2381	9.12934	10.8204	9.45903
hsa-miR-217	-5.8993	-5.50589	-3.74213	-6.98341	-6.82194	-6.23066	-6.43957	-5.41097
hsa-miR-218-5p	-1.1293	-4.84589	0.0678682	-2.29341	-1.88194	-6.23066	-1.52957	-0.060969
hsa-miR-219-5p	-2.8193	-1.85589	-3.00213	-4.08341	-2.69194	-0.390659	-3.24957	-5.41097
hsa-miR-221-3p	2.9507	3.79411	2.11787	2.66659	3.56806	4.45934	3.30043	2.84903
hsa-miR-222-3p	3.8207	4.57411	4.10787	3.54659	5.34806	4.55934	3.81043	3.73903
hsa-miR-223-3p	4.5407	1.97411	5.09787	4.63659	5.17806	3.39934	4.55043	4.52903
hsa-miR-22-3p	1.0007	1.54411	2.07787	1.24659	2.01806	-0.740659	3.12043	2.37903
hsa-miR-224-5p	0.850698	1.35411	-2.96213	-0.473411	-2.35194	-4.53066	-3.14957	-2.09097
hsa-miR-22-5p	-1.5593	-4.72589	-1.91213	-2.07341	-1.14194	-1.50066	0.630426	-0.700969
hsa-miR-23a-3p	7.1107	7.56411	7.46787	6.98659	7.30806	7.21934	7.42043	6.61903
hsa-miR-23b-3p	6.0907	6.47411	6.55787	5.80659	5.98806	5.89934	6.24043	5.37903
hsa-miR-24-3p	7.0007	7.62411	7.48787	7.16659	7.12806	6.73934	7.51043	6.94903
hsa-miR-25-3p	3.0907	3.26411	1.57787	1.77659	2.90806	4.00934	1.31043	1.66903
hsa-miR-26a-5p	6.2707	6.28411	6.69787	5.43659	6.42806	5.59934	6.20043	5.48903
hsa-miR-26b-5p	2.1107	2.10411	2.34787	1.81659	2.23806	2.06934	1.47043	1.48903
hsa-miR-27a-3p	5.6207	6.00411	5.72787	5.43659	5.83806	5.60934	5.60043	4.98903
hsa-miR-27b-3p	6.1007	6.71411	6.69787	6.26659	6.02806	5.83934	6.26043	5.73903
hsa-miR-28-5p	1.9107	1.75411	2.25787	1.29659	2.32806	1.58934	2.58043	2.02903
hsa-miR-296-5p	-2.9093	-2.05589	-1.22213	-2.50341	-1.91194	-6.23066	-1.09957	-3.97097
hsa-miR-299-5p	-3.7993	-7.87589	-2.22213	-5.23341	-3.04194	-6.23066	-0.309574	-5.41097
hsa-miR-29a-3p	5.1207	4.61411	3.73787	3.22659	4.78806	4.95934	3.97043	3.56903
hsa-miR-29b-2-5p	-2.1093	-1.24589	-0.632132	-1.67341	-2.08194	-6.23066	-1.42957	-5.41097
hsa-miR-29b-3p	2.0007	3.95411	2.30787	2.18659	3.23806	3.77934	2.05043	2.37903
hsa-miR-29c-3p	3.9907	4.11411	3.67787	3.01659	3.78806	3.74934	3.55043	3.33903
hsa-miR-301a-3p	0.380698	1.58411	0.927868	0.936589	0.828062	1.77934	0.530426	0.059031
hsa-miR-301b	-5.7893	-1.05589	-3.88213	-2.02341	-2.38194	-0.460659	-6.43957	-5.41097
hsa-miR-30a-5p	0.190698	-2.26589	1.64787	1.33659	-0.571938	-4.29066	0.200426	0.549031
hsa-miR-30b-5p	5.5107	6.75411	4.93787	5.43659	5.01806	5.20934	4.11043	4.27903
hsa-miR-30c-5p	3.9807	4.64411	4.38787	3.47659	3.87806	4.31934	3.94043	3.80903
hsa-miR-30d-5p	1.6007	2.72411	0.207868	1.33659	0.868062	1.28934	-0.339574	-0.660969
hsa-miR-30e-3p	-0.519302	-1.31589	-0.412132	-1.62341	-0.901938	-1.98066	-2.26957	-1.20097
hsa-miR-30e-5p	3.1307	4.10411	3.33787	3.24659	3.52806	3.76934	3.11043	2.91903
hsa-miR-31-3p	-1.9693	-0.0858915	-2.62213	-1.53341	-1.06194	-2.90066	-1.39957	-2.38097
hsa-miR-31-5p	1.4107	3.14411	0.327868	1.48659	2.06806	0.0693411	1.42043	-0.470969
hsa-miR-320a	4.1707	4.94411	4.36787	4.40659	5.00806	6.31934	4.38043	4.47903
hsa-miR-324-3p	0.170698	0.644109	0.637868	0.516589	-0.011938	0.929341	0.310426	0.779031
hsa-miR-324-5p	-0.529302	0.604109	-0.622132	-1.02341	-0.681938	-0.0506589	-1.21957	-1.37097
hsa-miR-32-5p	-1.5593	2.81411	0.247868	1.22659	-0.781938	2.83934	1.40043	1.73903
hsa-miR-326	-3.4393	-5.76589	-4.41213	-6.98341	-4.06194	-3.30066	-3.62957	-5.41097
hsa-miR-328	-2.3893	-3.47589	-1.15213	-2.22341	-2.28194	-3.60066	-2.59957	-1.52097
hsa-miR-329	-6.2893	-3.95589	-3.57213	-3.19341	-5.83194	-1.33066	-2.71957	-1.01097
hsa-miR-330-3p	-3.4093	-2.44589	-2.55213	-6.98341	-3.63194	-6.23066	-3.64957	-5.41097
hsa-miR-331-3p	0.0106977	0.954109	1.13787	0.166589	0.938062	1.26934	0.520426	-0.210969
hsa-miR-335-5p	-0.809302	0.424109	-1.47213	-0.133411	-0.091938	1.24934	-1.16957	-1.53097
hsa-miR-337-3p	-2.8093	-8.73589	-0.822132	-3.89341	-3.11194	-6.23066	-2.32957	-5.41097
hsa-miR-338-3p	0.160698	0.434109	-1.53213	-0.953411	-1.83194	-5.11066	-1.34957	-2.38097
hsa-miR-339-5p	0.840698	1.51411	-0.132132	-0.673411	0.538062	1.76934	-0.0595736	0.379031
hsa-miR-33a-5p	-4.3493	2.98411	-1.04213	1.02659	-2.80194	2.86934	-0.439574	-0.410969
hsa-miR-33b-5p	-3.8493	-1.74589	-6.16213	-3.13341	-1.93194	-2.53066	-6.43957	-3.56097
hsa-miR-342-3p	3.1807	0.0841085	4.73787	2.59659	2.91806	0.0193411	3.90043	2.35903
hsa-miR-345-5p	-2.0593	-1.28589	-2.86213	-2.50341	-1.94194	-0.380659	-1.52957	-1.53097
hsa-miR-346	-7.2093	-3.56589	-3.46213	-2.32341	-8.54194	-1.06066	-3.05957	-0.510969
hsa-miR-34a-5p	1.2507	1.47411	1.23787	0.386589	2.38806	2.41934	3.38043	3.05903
hsa-miR-34c-3p	-4.8793	-4.57589	-8.70213	-3.06341	-4.29194	-4.20066	-6.43957	-2.90097
hsa-miR-34c-5p	-5.0793	-5.48589	-3.04213	-3.61341	-4.60194	-6.23066	-6.43957	-5.41097
hsa-miR-361-3p	-2.0593	-1.78589	-3.28213	-2.36341	-2.19194	-4.67066	-1.46957	-2.15097
hsa-miR-361-5p	3.0907	4.07411	2.78787	2.94659	2.45806	3.24934	2.96043	2.65903
hsa-miR-362-5p	-2.5293	-1.60589	-4.68213	-3.78341	-3.85194	-4.04066	-4.63957	-2.88097
hsa-miR-363-3p	-6.5993	-5.93589	-6.90213	-6.98341	0.318062	1.87934	-3.03957	-0.770969
hsa-miR-365a-3p	0.970698	0.654109	1.32787	0.126589	1.43806	0.969341	2.02043	1.25903
hsa-miR-370	-3.8893	-8.73589	-2.21213	-2.68341	-4.42194	-6.23066	-3.24957	-5.41097
hsa-miR-373-3p	-12.8793	-8.73589	-8.70213	-6.98341	-11.9419	-3.73066	-6.43957	-1.51097
hsa-miR-374a-5p	1.9207	1.03411	1.68787	0.836589	1.11806	0.259341	1.34043	0.789031
hsa-miR-374b-3p	-5.3293	-4.88589	-5.38213	-6.98341	-5.51194	-6.23066	-6.43957	-5.41097
hsa-miR-374b-5p	2.5707	2.08411	1.62787	0.976589	1.34806	1.10934	0.950426	0.899031
hsa-miR-375	3.7907	5.52411	-0.712132	3.76659	1.10806	1.29934	-1.08957	-5.41097
hsa-miR-376a-3p	-2.7893	-6.14589	-0.882132	-3.32341	-2.04194	-6.23066	-1.20957	-2.65097
hsa-miR-376b-3p	-6.2693	-6.50589	-3.27213	-4.40341	-4.29194	-6.23066	-2.41957	-5.41097
hsa-miR-376c-3p	-1.0593	-5.41589	0.207868	-1.71341	-0.391938	-3.52066	-0.609574	-1.15097
hsa-miR-377-3p	-6.0493	-8.73589	-4.42213	-6.16341	-5.45194	-6.23066	-2.66957	-5.41097
hsa-miR-378a-3p	2.6207	3.31411	1.69787	2.28659	2.13806	2.80934	0.810426	2.62903
hsa-miR-379-5p	-1.8393	-8.73589	-0.802132	-2.91341	-1.64194	-6.23066	-0.109574	-0.730969
hsa-miR-381-3p	-5.0593	-8.73589	-3.42213	-6.98341	-4.41194	-6.23066	-6.43957	-5.41097
hsa-miR-382-5p	-2.0393	-5.71589	-0.562132	-3.60341	-2.02194	-6.23066	-2.56957	-0.770969
hsa-miR-383	-9.9193	-8.73589	-8.70213	-3.24341	-15.0819	-6.23066	-6.43957	-5.41097
hsa-miR-409-3p	-1.4793	-2.87589	0.217868	-1.41341	-1.71194	-6.23066	-0.959574	-1.70097
hsa-miR-410	-5.7893	-8.73589	-4.56213	-6.98341	-5.54194	-6.23066	-6.43957	-5.41097
hsa-miR-411-5p	-2.0293	-5.75589	-0.302132	-1.95341	-1.90194	-3.42066	-1.10957	-5.41097
hsa-miR-421	-1.1293	-1.78589	-2.20213	-5.78341	-2.41194	-1.27066	-1.33957	-2.85097
hsa-miR-423-3p	2.4907	3.52411	2.66787	2.64659	2.71806	3.99934	2.75043	2.90903
hsa-miR-423-5p	0.000697674	1.91411	0.977868	0.576589	0.598062	1.87934	1.71043	1.70903
hsa-miR-424-5p	1.8107	-0.465891	2.16787	1.10659	0.698062	-1.14066	1.85043	2.26903
hsa-miR-425-3p	-0.609302	0.604109	-1.14213	-0.973411	-0.631938	0.249341	-1.55957	-2.19097
hsa-miR-425-5p	2.5007	3.67411	0.0678682	2.20659	2.17806	2.63934	0.650426	0.259031
hsa-miR-429	3.8907	5.40411	-0.212132	4.08659	2.80806	4.06934	0.0504264	0.609031
hsa-miR-431-5p	-4.9393	-3.57589	-3.46213	-3.22341	-3.95194	-5.60066	-2.92957	-5.41097
hsa-miR-451a	1.4907	-0.505891	0.647868	2.99659	4.23806	-0.970659	0.910426	3.42903
hsa-miR-452-5p	-0.0993023	0.484109	-1.14213	-0.863411	-1.74194	-2.33066	-1.56957	-5.41097
hsa-miR-454-3p	1.0107	1.40411	0.807868	0.796589	0.798062	1.84934	0.480426	1.00903
hsa-miR-455-5p	-0.509302	0.564109	-1.20213	-0.493411	-1.70194	-2.89066	-1.24957	-1.21097
hsa-miR-483-3p	-6.9093	-5.41589	-5.10213	-3.62341	-4.85194	-3.16066	-2.85957	-5.41097
hsa-miR-484	0.940698	1.38411	1.49787	1.13659	1.21806	2.05934	1.48043	2.23903
hsa-miR-486-5p	-3.7893	-4.26589	-4.35213	-2.57341	-1.66194	-6.23066	-4.22957	-1.54097
hsa-miR-490-3p	-8.9593	-1.44589	-0.612132	0.566589	-6.89194	1.01934	1.21043	1.82903
hsa-miR-491-5p	-1.8493	-0.855891	-1.62213	-1.88341	-2.17194	-0.960659	-2.83957	-1.44097
hsa-miR-493-3p	-4.1493	-4.10589	-2.46213	-2.70341	-3.97194	-6.23066	-0.799574	-2.79097
hsa-miR-495-3p	-3.0893	-3.81589	-1.68213	-1.64341	-3.02194	-1.12066	-1.08957	-1.15097
hsa-miR-497-5p	-0.00930233	-1.55589	1.21787	1.01659	0.218062	-3.70066	1.95043	1.35903
hsa-miR-499a-5p	-5.1093	-4.56589	-8.70213	-6.98341	-6.26194	-6.23066	-6.43957	-5.41097
hsa-miR-500a-5p	-1.1693	0.0641085	-1.53213	-2.79341	-1.95194	-1.26066	-1.79957	-2.68097
hsa-miR-501-5p	-2.4593	-1.16589	-2.28213	-3.70341	-2.87194	-6.23066	-1.28957	-2.17097
hsa-miR-502-5p	-1.1293	1.19411	-0.752132	0.476589	-0.671938	1.53934	0.0504264	-0.630969
hsa-miR-503-5p	-4.9893	-4.53589	-4.89213	-3.19341	-5.22194	-6.23066	-6.43957	-2.29097
hsa-miR-505-3p	-0.809302	-0.435891	-0.982132	-1.06341	-1.12194	-2.87066	-0.919574	-2.38097
hsa-miR-509-3p	-3.9893	-4.89589	-4.86213	-6.98341	-7.93194	-6.23066	-6.43957	-2.06097
hsa-miR-514a-3p	-3.2393	-3.85589	-4.56213	-3.30341	-6.98194	-6.23066	-6.43957	-5.41097
hsa-miR-532-5p	0.750698	1.80411	-0.162132	0.656589	-0.801938	0.0893411	-1.48957	-0.220969
hsa-miR-539-5p	-5.2193	-5.44589	-4.26213	-6.98341	-4.82194	-6.23066	-3.18957	-1.68097
hsa-miR-542-5p	-5.2493	-8.73589	-3.74213	-6.98341	-5.91194	-2.41066	-3.12957	-0.580969
hsa-miR-545-3p	-7.8893	-5.19589	-4.22213	-5.30341	-7.20194	-6.23066	-4.15957	-4.80097
hsa-miR-550a-5p	-5.2893	-3.89589	-8.70213	-6.98341	-6.00194	-6.23066	-6.43957	-5.41097
hsa-miR-551b-3p	-4.8493	-8.73589	-2.69213	-3.92341	-4.81194	-6.23066	-6.43957	-5.41097
hsa-miR-570-3p	-6.2393	-3.46589	-4.97213	-6.98341	-6.18194	-6.23066	-6.43957	-5.41097
hsa-miR-574-3p	2.7407	3.66411	4.20787	3.16659	3.14806	1.45934	4.47043	3.46903
hsa-miR-582-5p	-1.2493	-1.68589	-0.482132	-1.63341	-1.21194	-0.0206589	-0.909574	-0.990969
hsa-miR-584-5p	-4.1593	-2.95589	-6.77213	-5.30341	-3.21194	-0.400659	-5.58957	-3.09097
hsa-miR-590-5p	0.0906977	-0.0258915	-0.842132	-1.08341	-0.211938	0.729341	-1.67957	-1.41097
hsa-miR-598	-3.3293	-5.66589	-2.73213	-3.93341	-0.361938	-0.260659	-2.37957	-2.51097
hsa-miR-625-3p	-3.1493	-1.30589	-4.98213	-6.98341	-1.64194	-3.20066	-3.31957	-5.41097
hsa-miR-628-3p	-4.1793	-4.12589	-3.82213	-3.62341	-3.96194	-6.23066	-3.72957	-5.41097
hsa-miR-629-5p	-2.6293	-1.20589	-5.65213	-3.30341	-2.54194	-1.73066	-2.06957	-1.55097
hsa-miR-642a-5p	-4.8493	-4.33589	-4.50213	-5.33341	-4.13194	-6.23066	-6.04957	-5.41097
hsa-miR-651	-4.4493	-4.50589	-3.78213	-6.98341	-4.43194	-6.23066	-6.43957	-5.41097
hsa-miR-652-3p	-0.0393023	0.934109	-0.562132	0.156589	-0.511938	0.489341	-0.389574	0.619031
hsa-miR-660-5p	1.7007	2.71411	1.13787	0.456589	0.438062	-0.260659	0.960426	-1.41097
hsa-miR-663a	-2.3393	-2.33589	-3.35213	-1.58341	-0.081938	0.219341	-0.759574	-1.50097
hsa-miR-665	-1.7193	-1.26589	-3.47213	-3.16341	-2.36194	0.359341	-1.43957	-0.130969
hsa-miR-671-5p	-3.7693	-1.45589	-3.38213	-1.92341	-2.89194	-2.14066	-3.23957	-3.51097
hsa-miR-708-5p	1.0107	-3.47589	2.26787	-0.163411	1.85806	-3.03066	3.10043	1.01903
hsa-miR-744-5p	-2.1293	-1.48589	-2.90213	-2.23341	-2.17194	-0.980659	-2.32957	-4.76097
hsa-miR-7-5p	0.980698	1.07411	-3.34213	-0.813411	0.138062	1.94934	-1.38957	-0.930969
hsa-miR-766-3p	-2.5193	-2.70589	-0.952132	-2.85341	-2.80194	-6.23066	-4.06957	-1.46097
hsa-miR-874	0.140698	-1.12589	1.33787	-0.533411	-0.131938	-3.65066	1.04043	0.769031
hsa-miR-877-5p	-2.4393	-3.38589	-2.54213	-6.98341	-1.09194	-1.12066	-2.91957	-2.14097
hsa-miR-887	-4.3993	-5.19589	-2.72213	-2.68341	-5.25194	-3.38066	-4.12957	-3.33097
hsa-miR-92a-3p	5.2607	7.39411	4.16787	5.78659	5.72806	8.56934	4.42043	4.94903
hsa-miR-92b-3p	-1.1393	0.564109	-0.792132	-0.673411	-1.20194	-0.350659	-1.03957	-1.49097
hsa-miR-934	-9.0393	-3.56589	-4.62213	-3.76341	-9.29194	-1.77066	-2.22957	-1.73097
hsa-miR-93-5p	4.9607	5.82411	2.82787	4.35659	4.58806	6.75934	3.04043	3.52903
hsa-miR-940	0.450698	3.91411	0.987868	-0.353411	1.09806	1.95934	0.730426	0.439031
hsa-miR-95	1.8607	3.22411	-1.68213	1.77659	-2.24194	0.159341	-2.07957	-1.13097
hsa-miR-9-5p	-4.9393	-5.29589	-4.06213	-6.98341	-3.85194	-6.23066	-4.22957	-2.90097
hsa-miR-96-5p	0.800698	2.51411	-3.25213	0.776589	0.838062	2.79934	-0.619574	-1.83097
hsa-miR-98-5p	-1.5893	-2.38589	-2.30213	-2.63341	-1.21194	-1.93066	-3.19957	-2.35097
hsa-miR-99a-3p	-3.0093	-8.73589	-0.292132	-6.98341	-4.33194	-6.23066	-1.70957	-5.41097
hsa-miR-99a-5p	3.6007	-0.845891	5.28787	2.11659	1.75806	-0.960659	2.37043	0.569031
hsa-miR-99b-5p	1.9307	-1.46589	3.01787	1.86659	1.86806	0.509341	2.08043	1.95903
SNORD38B	5.9107	8.05411	5.53787	7.05659	6.30806	7.93934	6.24043	7.46903
SNORD49A	6.5307	9.47411	6.53787	7.94659	6.78806	8.91934	6.83043	7.94903
U6 snRNA	0.170698	6.57411	3.65787	1.86659	1.12806	5.71934	4.10043	5.74903
Avg	-0.0494592	-0.0945189	-0.0617004	-0.066156	-0.0557811	-0.0885413	-0.0673383	-0.0830082
